# Calculating the Human Mutation Rate by Using a NUMT from the Early Oligocene.

Ian Logan<sup>1</sup>

## Abstract

As the number of whole genomes available for study increases, so also does the opportunity to find unsuspected features hidden within our genetic code. One such feature allows for an estimate of the Human Mutation Rate in human chromosomes to be made. A NUMT is a small fragment of the mitochondrial DNA that enters the nucleus of a cell, gets captured by a chromosome and thereafter passed on from generation to generation. Over the millions of years of evolution, this unexpected phenomenon has happened many times. But it is usually very difficult to be able to say just when a NUMT might have been created. However, this paper presents evidence to show that for one particular NUMT the date of formation was around 29 million ago, which places the event in the Early Oligocene; when our ancestors were small monkey-like creatures. So now all of us carry this NUMT in each of our cells as do Old World Monkeys, the Great Apes and our nearest relations, the Chimpanzees. The estimate of the Human Mutation obtained by the method outlined here gives a value which is higher than has been generally found; but this new value perhaps only applies to non-coding regions of the Human genome where there is little, if any, selection pressure against new mutations.

<sup>1</sup>Exmouth, Devon UK

Email: [ianlogan22@btinternet.com](mailto:ianlogan22@btinternet.com)

## INTRODUCTION

In the last few years an increasing number of primate species have had their genomes sequenced and the results placed in the Public Domain. The first genome was produced by the Human Genome Project, and now there are genomes for 15 species of Primate available for study at

<http://www.ncbi.nlm.nih.gov/mapview/>

The activity of examining a genome for a particular purpose has been described as data mining (Yao 2009); and there is no doubt that many interesting features of our DNA are yet to be found. The human genome contains the *coding* for about

20,000 active genes and this accounts for under a half of the DNA in the chromosomes, with the remainder being *non-coding*; and it is the data mining of the *non-coding* regions that is likely to yield the greatest surprises. In this paper a particular *non-coding* region is examined with the purpose of calculating the Human Mutation Rate.

Lipson et al. (2015) in their recent paper reviewed the importance of calculating the Human Mutation Rate and suggested 4 methods that can be used in its determination. The methods were – described in simple terms: [1] comparing corresponding DNA sequences DNA from different modern day species and counting the mutations that have occurred over an estimated period of

time; [2] comparing genomes from related modern day people and counting the observed differences; [3] comparing a modern day genome to an archaic genome, for example from a Neandertal or a Denisovan; and [4] a mathematical method termed *Ancestral recombination Density*.

These 4 methods give a Human Mutation rate ( $\mu$ ) in the region of:

$\mu = 1-2.5 \times 10^{-8}$  per base per generation (using 29 years as a generation)

But what does this really mean ?

And, a simpler concept might be to consider the percentage change in a DNA sequence, making  $\mu$  as described above equivalent to;

On average, 1-2.5% of the bases mutate in a period of 29 million years

This Human Mutation Rate is assumed to apply to the total DNA of the chromosomes, however *coding* DNA can be assumed to mutate at a much slower rate than *non-coding* DNA because of *selection* - with harmful mutations being *selected* against. Whereas, the mutation rate in a *non-coding* sequence has no such restriction and the mutation rate will be much higher.

In this paper a *non-coding* sequence, a mitochondrial NUMT, is described and used to calculate the Human Mutation rate as it applies to Chromosome 8; with the result being that a value for  $\mu$  is found that is higher than previously described.

## Mitochondrial DNA

In every cell of the body as it is formed there is a nucleus, containing 23 pairs of chromosomes, and in the cytoplasm are the mitochondria. These are small structures associated with the production

and transfer of energy within the cell and they contain short DNA molecules- the mitochondrial DNA (mtDNA). These molecules contain about 16,569 bases and in a person most of mtDNA molecules will be identical. The bases of the mtDNA can be considered as being numbered and their state (A, C, G or T) is usually described compared to the Cambridge Reference Sequence (CRS). (Anderson 1981, Andrews 1999)

The bases in the mtDNA do have a high mutation rate, much greater than that of the chromosomal DNA, with roughly 50 mutations having occurred in the last 200,000 years. Mutations can occur in all parts of the mtDNA, but there is *selection* against overtly harmful mutations being propagated, with the result that about 5 times as many mutations are observed in *non-coding* areas as opposed to *coding* areas. (Logan, 2007, Behar 2012)

The structure of the mtDNA has been extensively studied and in each molecule there is *coding* for 13 genes, 2 RNA molecules, and 22 tRNAs and sequences associated with the production of further mitochondria - such as the 'OriL' sequence concerned with the replication of the *light* strand. Also, and of importance in respect to this paper, are a number of *non-coding* sequences interspersed between the functional *coding* sequences.

In this paper the area of the mtDNA from base 5097 to base 7195 is of special interest and corresponds to: 2 incomplete genes (MT-ND2 & MT-CO1), 5 tRNAs (for the amino acids Tryptophan, Alanine, Asparagine, Cysteine & Tyrosine), the OriL region, and 3 *non-coding* regions. Table 1 shows this area of the mtDNA in some detail.

**Table 1: The parts of the mtDNA (CRS) for the region of interest (bases 5097–7195)**

4470–5511 gene MT-ND2  
...cctatctccc cttttataact aataatctta t  
(representative segment, the last 31 bases equating to peptide 'PISPFMLMIL' + STOP)

5512–5579 tRNA MT-TW (Tryptophan)  
agaaatt ta gggt aaataca gacc a agagc ctTCAaa gccct cagt aagtt gcaa tactt aatttctg

5580–5586 non-coding  
taacagc

5587–5655 tRNA MT-TA (Alanine)  
t aaggact gcaaa accccac tctgc atca actga acGCaaa tcagc c act taatt aagc ta agccctt

5656 non-coding  
a

5657–5729 tRNA MT-TN (Asparagine)  
c tagacca atggg acttaaa cccac aaaca cttag ttAACag ctaag c accc taatcaac tggc tt caatcta

5730–5760 'OriL' region  
cttctcccgccgcccgggaaaaaaggcgggag

5761–5826 tRNA MT-TC (Cysteine)  
a agccccg gcagg tttgaa gctgc ttctt cgaa ttTGcaa ttcaa t atga aaa tcac ct cggagct

5826–5891 tRNA MT-TY (Tyrosine)  
t ggtaaaa agagg cctaa cccct gtct ttaga ttTACag tccaa t gctt cact cagc ca ttttacc

5892–5903 non-coding  
tcacccccactg

5904–7445 gene MT-CO1  
atgttcgccgaccgttgactattctctcaaaaccacaaagacattggaacactataccta...  
(representative segment: first 60 bases equate to peptide 'MFADRWLFSTNHKDIGTLYL')

#### Notes

For the genes, MT-ND2 & MT-CO1, only representative segments are shown here.  
The full amino acid lists for the genes can be found on GenBank sequence NC\_012920

For the tRNAs, the important anti-codons are capitalised and the sequences are split into their functional parts

Note: at 5826 the base 't' is the final base for tRNA-cys and the first base for tRNA-tyr

## NUMT (NUclear MiTochondrial DNA)

A NUMT (pronounced as 'new-might') is a fragment of the mitochondrial DNA (mtDNA) that has become incorporated into a chromosome. Initially, it was thought this type of *capture* was an uncommon occurrence, but now it is suspected that the formation of NUMTs has occurred in all species and, although infrequent, is an ongoing process.

(Selected references: Herrnstadt 2009, Bensasson 2003, Hazkani-Covo 2008, Logan 2009, Simone 2011, Calabrese 2012)

Recently, a paper detailed a number of NUMTs that are to be found in the people from different populations around the world, showing that the formation of these NUMTs date to less than 200 thousand years. (Dayama 2014)

By the very nature of the method of its formation, a NUMT shows several random features:

Firstly, the fragment separated from the mtDNA can be small or large. However, in most instances it is not possible to data mine for small NUMTs, perhaps of less than 50 bases in length, but with increasing size the searching becomes easier. Now, over a thousand NUMTs have been identified in the Human genome.

Secondly, the actual chromosome *capturing* a NUMT appears to another random event. However, the number of NUMTs in a given chromosome is closely related to the overall size of the chromosome, with the largest, chromosome 1, having a considerable number of NUMTs.

Thirdly, the position of a NUMT within a chromosome again appears to be essentially random. However, there are reports describing NUMTs that have interfered with gene *coding* regions and caused disease. (Reviewed by Hazkani-Covo 2010)

Fourthly, the bases in a NUMT can themselves mutate over the generations, and as with any other mutation in a *non-coding* region there is unlikely to be *selection* against a mutation in a NUMT.

Fifthly, there is the question of *age determination*. A NUMT that has a sequence that closely matches a modern mtDNA sequence can be considered to be of recent origin. So if a NUMT shows almost total concordance it is likely to have been formed within, say, the last 5 million years. But if the match is as poor as 75% concordance, such a NUMT might have been formed, say, 30 million years ago. Unfortunately, it is not possible to ascertain the exact age of a given NUMT and there will always be a degree of uncertainty over any age that is suggested.

And, finally, there is the feature of inter-species *conservation*. A Human NUMT with an age of formation of more than, say, 6 million years is likely to be found in the genome of our closest relative, the Chimpanzee. And, with a Human NUMT formed, say, 30 million years ago, it might expected to be found in all the genomes of the Old World Monkeys, the Great Apes, and, of course, *Homo sapiens*.

## The Primate Evolutionary Tree (See Figure 1)

The exact dates involved in the Primate Evolutionary tree are uncertain, but the details in Figure 1 are probably reasonable. (Finstermeier 2013, Pozzi 2014)

To summarise, the figure shows modern day man as having separated from:

- the Chimpanzee and Bonobo around 6 million years ago
- the Great Apes (i.e. the Gorilla, Orangutan, and Gibbon) around 20 million years ago
- the Old World Monkeys (i.e. the Macaques and the Green monkey) around 25-30 million years ago.
- and the New World Monkeys and the earliest Primates (i.e. the Golden snub-nosed monkey, the Bolivian Squirrel Monkey, the White-tufted-ear marmoset, the Philippine tarsier and the Small-eared galago) more than 30 million years ago.

In this paper the period of 29 million years will be used to describe the separation between modern day man and the Green monkey solely because this figure allows the separation to be considered as having occurred 1 million generations ago.

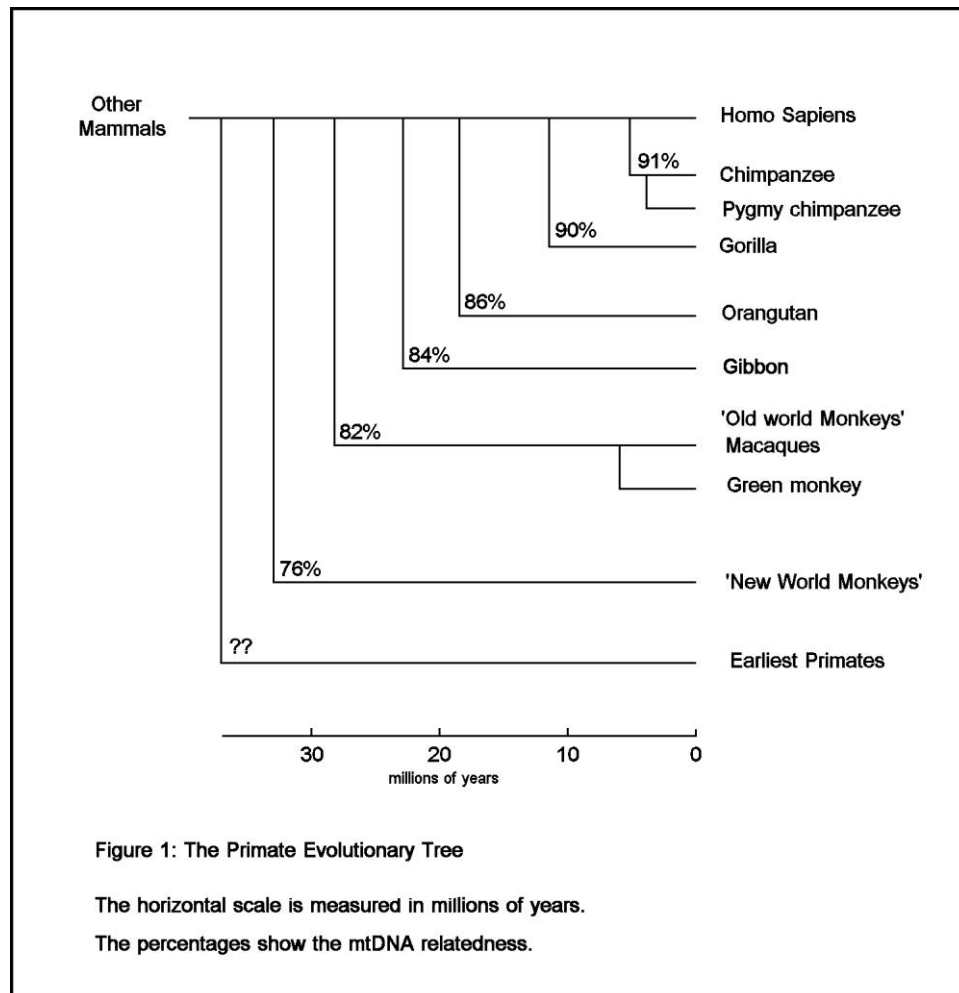

## Materials and methods

This paper identifies a selected region of Chromosome 8 as being a NUMT; and uses 4 DNA sequences as evidence to support this hypothesis.

The sequences are all obtainable from the NCBI's GenBank database.

The first sequence shows the region of the Human mtDNA sequence, the CRS, from bases 5097-7195. Details of how to obtain this sequence, and the 3 other sequences, is given in a step-by-step guide as part of the supplementary material.

The parts of this region of the first sequence are listed in table 1.

The second sequence is the presumed NUMT, from chromosome 8, coordinates 110933244-110935358. This NUMT has been also classified as HSA\_NumtS\_321 by Calabrese (2012).

It is to be noted that there are several NUMTs in the Human genome that match the CRS region 5097-7195. But there does appear to be only a single NUMT from chromosome 8.

The third and fourth sequences are the corresponding mtDNA and NUMT sequences from the genome of the Green monkey (*Chlorocebus sabaeus*).

For the purposes of this paper the genome of the Green monkey has been chosen, and the appropriate details provided, because it is the genome of a species which is the most distant in evolutionary terms from *Homo sapiens* and yet still shows the same NUMT. The genomes of the Rhesus macaque or the Crab-eating macaque would serve just as well.

Also, for clarity, a few bases at ends of the NUMT have not been selected as the bases do appear to vary between one genome and another.

## Results

The hypothesis suggested in this paper is firstly, that a NUMT corresponding to the mtDNA region 5097-7195 exists and can be found on Chromosome 8, and secondly it is suggested that this NUMT was formed about 29 million years ago. And, In order to support the two parts of the hypothesis 4 DNA sequences have been obtained from the GenBank database.

The first sequence comes from the mitochondrial genome of the Human, as represented by the CRS. The sequence contains the *coding* for parts of 2 genes, 5 tRNAs, the 'Oril' region, together with 3 *non-coding* regions.

The second sequence is from a region of Chromosome 8 and this is shown to be a NUMT as the sequence can be mapped against the first sequence without difficulty.

Table 2 shows the mapping of the CRS sequence against the NUMT and shows that all the different functional parts present in the CRS sequence can be demonstrated in the NUMT.

The third and fourth sequences repeat the above process, but this time using sequences from the genome of the Green Monkey.

Once again Table 2 shows how the 4 sequences map against each other in respect of all the different functional parts.

It is interesting to note that both the NUMT from the Human genome and that from the genome of the Green monkey have the same *insertion* of 16 bases in the tRNA sequence for the amino acid, Cysteine.

The presence of NUMTs that match each other and are found in the genomes of 2 species of primate that are considered to have separated from each other around 29 million years ago, does suggest that this NUMT was indeed formed at the time of separation, and in the Early Oligocene.

Whilst all the sequences map against each other, there are mutational differences between the sequences and the number of observable mutations is crucial to the estimation of the Human Mutation Rate.

And, <http://www.ncbi.nlm.nih.gov/mapview/> and BLAST (Altschul 1990) can be used to show that the correspondence between the Human NUMT sequence and that of the modern Human mtDNA sequence is about 76%, or putting it another way, about 24% of the bases of the NUMT show mutations. However, this method of comparing a NUMT sequence from a chromosome with a modern mtDNA sequence gives a very high figure as the mutation rate in mitochondrial DNA is very much higher than in chromosomal DNA.

But it is possible to calculate the Human Mutational Rate by considering the mutational changes that show as differences in the DNA sequences of the two NUMTs from the Human and the Green monkey. This method looks for the mutations that have occurred over a period of 29 million years in both species and therefore half the number of differences can be assumed to have occurred in just one NUMT.

The number of differences between the 2 NUMTs is approximately 7.6 % (150 base mutations and 14 small insertions/deletions in the 2,115 bases) which suggests a Mutation Rate value of  $\mu = 3.8 \times 10^{-8}$  per base per generation.



**Table 2: The 4 sequences compared**

tRNA MT-TW

|          |         |    |      |         |      |   |       |         |       |      |        |      |       |          |
|----------|---------|----|------|---------|------|---|-------|---------|-------|------|--------|------|-------|----------|
| 1. CRS   | agaaatt | ta | ggtt | aaataca | gacc | a | agagc | ctTCAaa | gccct | cagt | aagtt  | gcaa | tactt | aatttctg |
| 2. NUMT  | agaaatt | ta | ggtt | aaataa  | gacc | a | atggc | ctTCAaa | gccct | tagc | aagtaa | atta | tactt | aatttctg |
| 3. Green | agaaatt | ta | ggtt | aaataa  | gacc | a | agagc | ctTCAaa | gccct | tagt | aagt   | agac | cactt | aatttctg |
| 4. NUMT  | agaaatt | ca | ggtt | aatga   | gacc | a | atggc | ctTCAaa | gcctt | tagc | aagtaa | atta | tact  | catttctg |

Non-coding

|          |           |
|----------|-----------|
| 1. CRS   | taacagc   |
| 2. NUMT  | caacaaacc |
| 3. Green | aaacata   |
| 4. NUMT  | caacaaagc |

tRNA MT-TA

|          |   |         |       |         |       |      |       |         |       |   |     |        |      |    |         |
|----------|---|---------|-------|---------|-------|------|-------|---------|-------|---|-----|--------|------|----|---------|
| 1. CRS   | t | aaggact | gcaaa | acccac  | tctgc | atca | actga | acGCAaa | tcagc | c | act | taatt  | aagc | ta | agccctt |
| 2. NUMT  | t | aaggact | gcaag | actccac | tctgc | atca | attga | acGCAaa | tcaac | t | act | ttaatt | aagc | ta | agccctc |
| 3. Green | t | aaggact | gcaaa | aacctac | tctgc | atca | attga | acGCAaa | tcaac | c | act | ttaatt | aagc | ta | agccctt |
| 4. NUMT  | t | aaggact | gcaaa | actccac | tctgc | atca | attga | acGCAaa | tcaac | c | act | ttaatt | aagc | ta | agccctc |

Non-coding

|          |   |
|----------|---|
| 1. CRS   | a |
| 2. NUMT  | t |
| 3. Green | a |
| 4. NUMT  | g |

tRNA MT-TN

|          |   |         |       |         |       |       |       |         |       |   |     |          |      |    |         |
|----------|---|---------|-------|---------|-------|-------|-------|---------|-------|---|-----|----------|------|----|---------|
| 1. CRS   | c | tagacca | atggg | acttaaa | cccac | aaaca | cttag | ttAACag | ctaag | c | acc | taatcaac | tggc | tt | caatcta |
| 2. NUMT  | c | tagattg | gtgga | attaaac | ccacg | aaa-a | tttag | ttAACag | ctaaa | c | acc | taatcaag | tggc | tt | caatcta |
| 3. Green | c | tagacca | atggg | actcaaa | cccat | aaaaa | tttag | ttAACag | ctaaa | c | acc | taatcaac | tggc | tt | tgatcca |
| 4. NUMT  | c | tagcttg | atgga | attaaac | ccacg | aaa-a | tttag | ttAACag | ctaaa | c | acc | taatcaac | tggc | tt | caatctg |

Oril

|          |                                 |
|----------|---------------------------------|
| 1. CRS   | cttctcccgcgcgggaaaaaaggcgggag   |
| 2. NUMT  | cttctcccgcgcgtgggaaaaaaggcgggag |
| 3. Green | cttctcccgcgcgagaaaaaaggcgggag   |
| 4. NUMT  | cttctcccacgcctgggaaaaaaggcgggag |

tRNA MT-TC

|          |   |         |       |        |         |       |      |                   |         |       |   |      |     |      |    |         |
|----------|---|---------|-------|--------|---------|-------|------|-------------------|---------|-------|---|------|-----|------|----|---------|
| 1. CRS   | a | agccccg | gcagg | tttgaa | --gctgc | tcctt | cgaa | -----             | ttTGcaa | ttcaa | t | atga | aaa | tcac | ct | cggagct |
| 2. NUMT  | a | agccctg | gcagg | agtgaa | --gctgc | tcctt | tgaa | cttagtctgaattttca | tgTTGaa | ttcaa | c | atga | aaa | tcac | ct | cgggact |
| 3. Green | a | agccccg | gcaga | aactta | aaactgc | tcctt | taaa | -----             | ctTGcaa | tttaa | c | atga | aaa | tcac | ct | cggggct |
| 4. NUMT  | a | agccccg | gcagg | attgaa | --gctgc | tcctt | tgaa | cttcgtctgcattttca | tgTTGaa | ttcaa | c | atga | aaa | tcac | ct | tgggact |

tRNA MT-TY

|          |   |         |       |        |       |       |       |         |       |   |      |      |      |    |         |
|----------|---|---------|-------|--------|-------|-------|-------|---------|-------|---|------|------|------|----|---------|
| 1. CRS   | t | ggtaaaa | agagg | cctaa  | cccct | gtct  | ttaga | ttTACag | tccaa | t | gctt | cact | cagc | ca | ttttacc |
| 2. NUMT  | t | ggtaaaa | agagg | ccttaa | cctcc | atct  | tcaga | ttTGCag | tctaa | t | gttt | -act | cagc | ca | ttttacc |
| 3. Green | t | ggcaaaa | agagg | atcaga | cctct | gtct  | tcagg | ttTACag | cctaa | t | gctt | -act | cagc | ca | ttttacc |
| 4. NUMT  | t | ggtgaaa | agagg | ccttaa | cttc  | tgtct | ttaga | ttTACag | tttaa | t | gctt | -act | cagc | ca | ttttacc |

Non-coding

|          |                  |
|----------|------------------|
| 1. CRS   | tcacccccactg     |
| 2. NUMT  | tttttcaactccactt |
| 3. Green | cttcctccaccc     |
| 4. NUMT  | tttttcaactccactt |

Gene MT-CO1 (representative first 60 bases shown here)

|          |                                                                 |   |                             |
|----------|-----------------------------------------------------------------|---|-----------------------------|
| 1. CRS   | atgttcgcccgcggttgactattctctacaaccacaaagacattggaacactataccta     | = | 'MFADRWLFSTNHKDIGTLYL'      |
| 2. NUMT  | atgttcacaaaccgttgattgttttcaagcaaccacaaagacattggaacattatagtta    | = | 'MFINRWLFSSNHKDMGTL<STOP>L' |
| 3. Green | atgttcattaatcggttgactcttttcaacaaccataaagacatcggaactctataccta    | = | 'MFINRWLFSTNHKDIGTLYL'      |
| 4. NUMT  | acgttcacaaaccgttgattgttttcaagcaaccacaaagacattggaacatcactataccta | = | 'TFINRWLFSSNHKDIATSYL'      |

The 4 sequences are:

1. The CRS mtDNA sequence
2. The Human NUMT from Chromosome 8
3. The mtDNA from the Green monkey genome
4. The Green monkey NUMT from chromosome 8

## Discussion

The claim to being able to calculate the Human Mutation Rate by using a new method has to be justified carefully.

In this study the existence of a NUMT corresponding to a substantial part of the mtDNA molecule has been shown. The NUMT found on Chromosome 8 is over 2,100 bases in length and maps against the mtDNA sequence of modern day man, using the CRS as the example, in respect of gene *coding*, multiple tRNA *coding*, the special OriL region, as well as several distinctively sized *non-coding* regions. Repeating the process with the genome of our distant relative the Green monkey also shows that the same NUMT is to be found on its chromosome 8. This NUMT from a distantly related species also shows the same distinctive features, which strongly suggest the common origin of both NUMTs in a single event; and the subsequent conservation in the two species.

The method therefore can be considered as showing that the original NUMT was formed around 29 million years ago. (This figure used as it represents 1 million generations.) But there has to be considerable uncertainty over this figure and even to use the wide range of +/- 5 million years might not be unreasonable.

Also, there is the question of whether it is reasonable to compare the NUMT from the modern Human mtDNA sequence against the NUMT from the Green monkey to obtain a measure of the Human Mutation Rate. Clearly, bases within the NUMT will have mutated since its formation, and it appears that perhaps 7.6 % of them have perhaps done so. This figure shows the mutations that have occurred in both NUMTs and therefore the figure has to be halved to obtain the Mutation Rate as it applies just to the Human.

For the above reasons, a suggested value of  $\mu = 3.8 \times 10^{-8}$  per base per generation must be considered as having a wide margin of uncertainty, although it is hard to believe the rate would be higher. Therefore, it is perhaps best to consider that this new method of calculating the Human Mutation Rate gives a value of  $\mu = 3 - 4 \times 10^{-8}$  per base per generation. This value is higher than previous estimates, and probably reflects that in purely *non-coding* DNA the mutation rate is high when there is little, if any, selection against mutations.

The paper tries to highlight the difficulties in obtaining a meaningful figure for the Human Mutation Rate when it is not possible to compare DNA sequences directly. The use of a NUMT, which is considered to be a 'fossilised' record of the mtDNA as it was at the time of the formation of the NUMT is an attempt to obtain an archaic sequence which can then be compared to a modern day sequence. This method does perhaps resolve some of the problems used in other methods (as reviewed by Lipson 2015).

Also, there is the question as to whether the term 'Human Mutation Rate' can be considered to refer to a single quantity. Or, is there one figure for *coding* regions, another for *non-coding* regions, and a third overall figure. In this paper the suggested Human Mutation Rate applies only to *non-coding* regions.

And, is it reasonable to use a figure of 29 years per generation when considering mutations that have occurred since the Oligocene in the Human ancestral line and that of the Green monkey.

Overall the method does give a useful value for the Human Mutation Rate that can be compared to that obtained by other methods.



## References:

Altschul, S. F., W. Gish, W. Miller, E. W. Myers, and D. J. Lipman. (1990)  
Basic local alignment search tool  
J. Mol. Biol. 215:403–410.

Anderson S, Bankier AT, Barrell BG, de  
Bruijn MH, Coulson AR, Drouin J,  
Eperon IC, Nierlich DP, Roe BA, Sanger F,  
Schreier PH, Smith AJ, Staden R,  
Young IG. (1981)  
Sequence and organization of the human  
mitochondrial genome.  
Nature Apr 9;290(5806):457-65.

Andrews RM, Kubacka I, Chinnery PF,  
Lightowlers RN, Turnbull DM, Howell N.  
(1999)  
Reanalysis and revision of the Cambridge  
reference sequence for human  
mitochondrial DNA.  
Nat Genet. Oct;23(2):147.

Behar DM, van Oven M, Rosset S,  
Metspalu M, Loogväli EL, Silva NM,  
Kivisild T, Torroni A, Villems R. (2012)  
A "Copernican" reassessment of the  
human mitochondrial DNA tree from its  
root.  
Am J Hum Genet. Apr 6;90(4):675-84.

Calabrese FM, Simone D, Attimonelli  
M.(2012)  
Primates and mouse NumtS in the UCSC  
Genome Browser.  
BMC Bioinformatics. Mar 28;13

Dayama G, Emery SB, Kidd JM, Mills RE.  
(2014)  
The genomic landscape of polymorphic  
human nuclear mitochondrial insertions  
Nucleic Acids Res.  
Nov 10;42(20):12640-9

Douda Bensasson, Marcus W. Feldman,  
Dmitri A. Petrov (2003)  
Rates of DNA Duplication and  
Mitochondrial DNA Insertion in the  
Human Genome  
J Mol Evol 57:343–354

Francesco Maria Calabrese, Domenico  
Simone, Marcella Attimonelli. (2012)  
Primates and mouse NumtS in the UCSC  
Genome Browser  
BMC Bioinformatics 13(Suppl 4):S15.

Finstermeier K, Zinner D, Brameier M,  
Meyer M, Kreuz E, et al. (2013)  
A Mitogenomic Phylogeny of Living  
Primates  
PLoS ONE 8(7)

Hazkani-Covo E, Covo S (2008)  
Numt-Mediated Double-Strand Break  
Repair Mitigates Deletions during Primate  
Genome Evolution  
PLoS Genet 4(10)

Einat Hazkani-Covo, Raymond M. Zeller,  
and William Martin (2010)  
Molecular Poltergeists: Mitochondrial  
DNA Copies (numts) in Sequenced  
Nuclear Genomes  
PLoS Genet. Feb; 6(2)

Herrnstadt C, Clevenger W, Ghosh SS,  
Anderson C, Fahy E, Miller S, Howell N,  
Davis RE.(1999)  
A novel mitochondrial DNA-like sequence  
in the human nuclear genome  
Genomics. Aug 15;60(1):67-77.

Mark Lipson, Po-Ru Loh, Sriram  
Sankararaman, Nick Patterson, Bonnie  
Berger, David Reich (2015)  
Calibrating the Human Mutation Rate via  
Ancestral Recombination Density in  
Diploid Genomes  
<http://dx.doi.org/10.1101/015560>

Logan, I (2007)  
A Suggested Mitochondrial Genome for  
'Mitochondrial Eve'  
JoGG 3(2):72-77  
Available at:  
<http://www.jogg.info/32/logan.pdf>

Logan, I (2009)  
The Continuing Hunt for Nuclear  
Mitochondrial DNA sequences (NUMTs)  
in the Human Genome  
JoGG 5(1):23-34 Available at:  
<http://www.jogg.info/51/files/LoganNUMT.pdf>

Pozzi L, Hodgson JA, Burrell AS, Sterner KN, Raaum RL, Disotell TR.(2014)  
Primate phylogenetic relationships and divergence dates inferred from complete mitochondrial genomes.  
Mol Phylogenet Evol. Jun;75:165-83.

Domenico Simone, Francesco Maria Calabrese, Martin Lang, Giuseppe Gasparre, Marcella Attimonelli (2011)  
The reference human nuclear mitochondrial sequences compilation validated and implemented on the UCSC genome browser  
BMC Genomics. 2011 Oct 20;12:517

Yong-Gang Yao, Antonio Salas, Ian Logan, and Hans-Jürgen Bandelt (2009)  
mtDNA Data Mining in GenBank Needs Surveying  
Am J Hum Genet. 2009 Dec 11; 85(6): 929-933.

Supplementary material:

There are 2 parts to the supplementary material

Supplement: A

A step-by-step guide showing how to obtain the 4 sequences discussed in the paper.

Supplement: B

The 4 sequences identified in the paper given in FASTA format

## Supplement A:

A step-by-step guide showing how to obtain the 4 sequences discussed in the paper.

In order to keep the paper as simple as possible, the selection of sequences is restricted to just 4 sequences – all obtainable from the NCBI GenBank database.

The first sequence: Human mtDNA (CRS)

By using: [http://www.ncbi.nlm.nih.gov/nuccore/NC\\_012920](http://www.ncbi.nlm.nih.gov/nuccore/NC_012920)

With the *Change region shown* set *from*: 5097 & *to*: 7195

Click on *Update View*

This gives sequence of 2099 bases from the Human mtDNA (CRS).

The second sequence: The Human NUMT

Open <http://www.ncbi.nlm.nih.gov/mapview/>

Following along the Homo sapiens line click on B (for BLAST)

Enter the first sequence into the box

Select *Somewhat similar sequences (blastn)*

Select BLAST

When the hits appear, select the NUMT for Chromosome 8

This shows the NUMT is to be found on sequence

NC\_000008 coordinates 110933244-110935358

And can be fetched from:

[http://www.ncbi.nlm.nih.gov/nuccore/NC\\_000008](http://www.ncbi.nlm.nih.gov/nuccore/NC_000008)

Use *Customize view & show reverse complement* to get the matching orientation.

This gives the corresponding Human NUMT.

The third sequence: The Green Monkey mtDNA

Open <http://www.ncbi.nlm.nih.gov/mapview/>

Following along the line Chlorocebus sabaeus click on B (for BLAST)

And using the first sequence and *blastn*,

Shows the corresponding Green Monkey mtDNA sequence is located at:

NC\_008066 5092-7190

And this sequence can be downloaded from:

[http://www.ncbi.nlm.nih.gov/nuccore/NC\\_008066](http://www.ncbi.nlm.nih.gov/nuccore/NC_008066)

The fourth sequence: The Green Monkey NUMT from Chromosome 8

This is obtainable from:

<http://www.ncbi.nlm.nih.gov/mapview/>

Following along the line Chlorocebus sabaeus click on B (for BLAST)

and inputting the second sequence and using *blastn*.

The NUMT is found on NC\_023649 at 105641836-105643957

And the sequence can be fetched from:

[http://www.ncbi.nlm.nih.gov/nuccore/NC\\_023649](http://www.ncbi.nlm.nih.gov/nuccore/NC_023649)

using *from*: 105641836 & *to*: 105643957 and *show reverse complement*

# Supplement: b: The 4 sequences identified in the text listed as FASTA format.

## 1. The 2099 base sequence from the Human mtDNA 5097-7195 NC\_012920

```

1 atcctaacta ctaccgcatt cctactactc aacttaaaact ccagcaccac gaccctacta
61 ctatctcgca cctgaaacaa gctaacaatga ctaaacacct taattccatc caccctcttc
121 tccctaggag gcctgcccc gctaaccggc tttttgccc aatgggcat tatcgaagaa
181 ttacacaaaa acaatagcct catcatcccc accatcatag ccaccatcac cctccttaac
241 ctctactttc actacgcct aatctactcc acctcaatca cactactccc catatctaac
301 aacgtaaaaa taaaatgaca gtttgaacat acaaaaccca cccatttctt cccacacttc
361 atcgccctta ccagcgtact cctacctaac tcccccttta tactaataat cttatagaaa
421 tttaggttaa atacagacca agagccttca aagccctcag taagttgcaa tacttaattt
481 ctgtaacagc taaggactgc aaaacccac tctgcatcaa ctgaacgcaa atcagccact
541 ttaattaaag taagccctta ctagaccaat gggacttaaa cccacaaca cttagttaac
601 agctaagcac cctaatacac tggcttcaat ctacttctcc cgccgcccgg aaaaaaggcg
661 ggagaagccc cggcagggtt gaagctgctt cttcgaattt gcaattcaat atgaaaatca
721 cctcggagct ggtaaaaaga ggcctaacc cttgtctttg atttacagtc caatgttca
781 ctacagccat ttacctcac cccactgatg ttgcgcgacc gttgactatt cttacaacac
841 cacaagaca ttggaacact atacctatta ttcggcgcat gagctggagt cctaggcaca
901 gctctaagcc tccttattcg agccgagctg ggccagccag gcaaccttct aggtaacgac
961 cacatctaca acgttatcgt cacagcccat gcatttgtaa taatcttctt catagtaata
1021 cccatcataa tcggaggctt tggcaactga ctagtctccc taataatcgg tgcccccgat
1081 atggcggttt cccgcataaa caacataagc ttctgactct tacctcccct tctcctactc
1141 ctgctcgcat ctgctatagt ggaggccgga gcaggaacag gttgaacagt ctacctctcc
1201 ttacgagggg actactccca cctggagacc tccgtagacc taacctctt ctccttacac
1261 ctacgaggtg tctcctctat cttaggggac atcaatttca tcacaacaa tatcaatata
1321 aaacccccct ccataaccca ataccacacg cccctctctg tctgatccgt cctaatacaca
1381 gcagtcctac ttctctatc tctcccagtc ctactgctg gcatcactat actactaaca
1441 gaccgcaacc tcaacaccac cttctctgac ccgcgaggag gaggagaccc cattctatac
1501 caacacctat tctgattttt cggtcaccct gaagtttata ttcttatcctt accaggcttc
1561 ggaataatct cccatattgt aacttactac tccggaaaaa aagaaccatt tggatacata
1621 ggtatggtct gagctatgat atcaattggc ttcttagggt ttatcgtgtg agcacaccat
1681 atattttacag taggaataga cgtagacaca cgagcatatt tcacctccgc tcacataatc
1741 atcgctatcc ccacggcggt caaagtattt agctgactcg ccacactcca cggaagcaat
1801 atgaatgat ctgctgagct gctctgagcc ctaggattca tctttctttt caccgtaggt
1861 ggccgtgact gcattgtatt agcaaaccca tcaatagaca tctgactaca cgacacgtac
1921 tacgtttagt cccacttcca ctatgtccta tcaataggag ctgtatttgc catcatagga
1981 ggcttcattc actgatttcc cctatttcca ggctacaccc tagaccaaac ctacgcaaaa
2041 atccatttca ctatcatatt catcggcgta aatctaactt tcttcccaca acactttct

```

Base analysis: a=590, c=660, g=306, t=543 total=2099  
a=28.1%, c=31.4%, g=14.6%, t=25.9%

## 2. The Human Chromosome 8 NUMT

```

1 attctaaca ttaccgcatt tcttacactc aatctgagca caagcactac aaccctatca
61 atattccaca cctgaaataa actaacatga ctaaacacta taattccatt aattttatta
121 tccctaggag gtttaccctt attaatggga tttctcccta aatgagttac catccaagaa
181 cttacacaaa acaacagctt tattacccca accattatag atattataac cctactcaac
241 ctatactttt acacacgctt aatttactct accctagtag caatattccc cacatctaac
301 aacataaaaa taaaatgacg gttcaaaaac acaaagtcca tattaccctt cccccactt
361 ataatctcta cctctctctt acctatttct ccattaaacac tatctatgat ctagaatttt
421 aggttaaata agaccaatgg ccttcaaacg ctttagcaag taaattatac ttaatttctg
481 caacaaacct aaggactgca agactccact ctgcatcaat tgaacgcaaa tcaactactt
541 taattaaagt aagccctctc tagattggtg gaattaaacc cacgaaaatt tagttaacag
601 ctaaacaccc taatcaagt gcttcaatct acttctcccg ccgctgggaa aaaaggcggg
661 agaagccctg gcaggagtga agctgctcct ttgaacttag tctgaatttt catgttgaat
721 tcaacatgaa aatcacctcg ggactggtaa aaagaggcct taacctccat cttcagattt
781 gcagtctaatt gttactcag ccattttacc tttttcactc cacttatggt catcaaccgt
841 tgattgtttt caagcaacca caaagacatg ggaacattat agttactatt ctgtgcatga
901 gcagggatag caggcacagc ctttaagcctc ctatttcaag cagaactggg ccaaccaggt
961 actctgctag aagatgatca aatttacaaa gttattgtta cctcccacgc atttatcata
1021 attttcttta tagttatacc aatcataatc ggagggtttg gcaactgatt agttcctctc
1081 ataattggct ctcttgatat ggcattttccc cgaataaata acgtgagttt ctgacttctc
1141 cctccccccc tttctactcg ttatttgcatt tctcaatggt agaggctggc agtgggaccc
1201 gctggacagt ttatctctcc ttaacaggaa tcttaacatg caggatcctc tgtggacctg
1261 accatcttct cacttaattt agcaggcatc ttttctattc tagaagctat taattttact
1321 accacaatca ttaacatgaa tcccttgccc atatccctac atcacacacc cctcttctgc
1381 tgatcagccc cagttacagc agttcttcta cttctttctc ttccagacct agccgcccgc
1441 attactatgc tattaactga ctgtaattct aacactacat tgtctgacct agctgtcaga
1501 ggtgacctcg tctgcatta acacttatct gattttttgg ccactctgaa gtctatgtcc
1561 ttatcttata aggtcttctg ataattctcc acatcgtaac acactattct ggaaaaaagg
1621 aaccatttgc gtgcatgggc atagtagtag ccatagatgc agttgggttc taggatttat
1681 catatgggct caccacatac ttacagtagg aatagatgta gatataggag catacttcac
1741 ctctgccact ataattattg ccttccccgc tggcatcaaa gtcttttagt ggtagcttc
1801 actacatggc agcaacatca aatgatcccc cacaattctt tgagccctgg gtttatatc
1861 cctttttaca ttaggaggtc tgaccggcat tgtactagct aactcatcac tagacattgt
1921 cttgcatgac acatattatt ttgtagctca tttccattac atcttatcac taggagccgt
1981 atttgcattt ataggagct ttgtccactg atttccccta tttcagggt atatacttag
2041 tcagacctat gctaaaattc acttttccat catgtttata ggtgttaatt tgactttttt
2101 cccacagcat ttct

```

Notes:

Base analysis (excluding the insertion 'cttagtctgaattttca')  
a=605, c=533, g=306, t=654 total=2098  
a=28.8%, c=25.4%, g=14.6%, t=31.2%

Chromosome coordinates: GRCh38/Hg38 110933244-110935358  
GRCh37/Hg19 111945473-111947587  
And described as HSA\_NUMT5\_321 by Calabrese(2012)

### 3. Green Monkey mtDNA Bases 5092-7190

```

1 gccctracaa ccaccatatt cctattcctc aatctgaact caaataccac aacccttaca
61 ctatccctya cctgaaacaa atcaccccaa ctcataccac taacaatatt cacccttata
121 tccctaggag gwttaccccc rctaaccggc tttyctaccta aatgaataac tattcaagaa
181 ctttrcaataa acarcaactt ygtcatcccc tccatcatag tcaycataac yctacttaac
241 ctgtacttct acatacgctt aatctacact gtctcagtat cactatttcc caccctcaac
301 aacacaaaaa tgacttgaca acttgaaaac acaaaaacca caccctcac cccacactc
361 accatcattt ctactctcct actaccaatc acccccctaa tcctaactat tccctagaaa
421 tttagggttaa ataagaccaa gagccttcaa agcccctagt aagtagacca cttaatttct
481 gaaacatata aggactgcaa aaacctactc tgcatacaatt gaacgcaaat caaccacttt
541 aattaagcta agcccctact agaccaatgg gactcaaacc cataaaaaatt tagttaacag
601 ctaaacaccc taatcaactg gctttgatcc acttctcccg ccacgagaaa aaaaggcggg
661 agaagccccc gcagaaactt aaaactgctc ctttaaaactt gcaatttaac atgaaaatca
721 cctcggggct ggcaaaaaga ggatcagacc tctgtcttca gggttacagc ctaatgctta
781 ctgagccatt ttacccttcc tccaccatag ttcattaatc gttgactctt ttcaacaacac
841 cataaagaca tcggaactct atacctacta ttcgggtgcat gagctggaat cataggtaca
901 gctctaagcc ttctcattcg agctgaatta ggccaaccg gtagtttact aggcagtgc
961 catatctata atgtcattgt aacagcccat gcattttatta taatttttct catagtata
1021 cccattataa tccggggggt cggaactgta ctagtaccct tgataattgg tgctcctgac
1081 atagcatttc cccgtctaaa taatatgagc ttctgacttc tcccccttc cttcctgctg
1141 ctaatggcat caaccataat cgaaggctggc gctggaacag gttgaacagt ataccccccc
1201 tttagcaggaa acctctctca cccaggggcc tccgtagact tagttatttt ctcctccac
1261 ctgacaggag ttctctctat cctgggggct atcaacttca ttaccacat tatcaacatg
1321 aagccccccg ccataatcca gtatcaaacc ccgttatttg tctgacttgt cctaatacaca
1381 gcaatcctac tactctctc cctgccagtc tttagctgcg gcattactat actattaaca
1441 gaccgcaacc tcaacactac cttctttgat cctactggag ggggagaccc tatcctatac
1501 caacacctat ttgattctt tggtcaccct gaagtctaca tctctattct cccggggttc
1561 ggaataatct ccaataatct aacttactac tccgggaaga aagagccatt tggatatata
1621 ggtataacct gggctataat gtcaatcggg ttccctaggat ttattgtatg agcccatcat
1681 atattttacg tgggtataga tgtggacaca cgggcctact ttacctctgc tactataatc
1741 attgcaattc ctactgtagt taaagttttc agctgacttg ctacacttca tggaggcaat
1801 atcaaatgat ctgccgcaat actttgagcc ctaggcttta tttttctatt caccataggg
1861 ggtctcaccg gtattatctt agcaaacctc tccctagata ttgtactaca cgatacatac
1921 tatgtttgct ccatcttctc ctatgttttg tcaataggag ctgtttttgc cattataggg
1981 ggctttgtcc actgattccc tttattttca ggctacacat tagaccaaac ctatgccaaa
2041 gccacttata ttattatatt cacaggcgta aatttaacct tttttccaca acacttcc

```

### 4. Green Monkey NUMT on Chromosome 8

```

1 attctaacaa ttaccgcatt tccagcactc aatctgagca caagcagtag aaccctatca
61 ttattccaca cctgaaataa accaacatga ctaaacacta taatccatta attttattat
121 ccttaggagg ttatccctcg ttaggacttc tccctaaatg agttaccatc taagaactta
181 caaaaaatga gtcttattgc cccaaccatt ataaatagta taaccctact caacctatac
241 ttttataat gtgtaattta ctccacctca gtgacaatat tccccacatc taataacata
301 aaaataaaat gatagttcaa aaacagaaag tccatattaa cccctccccc acttataatc
361 tcctctacgc tcctcttacc tattttctca ttaacactag ctgtgatctc gaaattcagg
421 ttaaatgaga ccaatggcct tcaagcctt tagcaagtaa attatacttc atttctgcaa
481 caaagctaa gactgcaaaa ctccactctg catcaattga acgcaaatca accactttaa
541 ttaagctaa cctcgtag ctgtgatgaa ttaaacccac gaaaatttag ttaacagcta
601 aacaccccaa tcaactggct tcaatctgct tctcccacg ctgggaaaaa aggcgggaga
661 agccccggca ggattgaagc tgctcctttg aacttcgtct gcattttcat gtggaattca
721 acatgaaaat cacttgggga ctgggtgaaa gaggccttaa cttctgtctt tagatttaca
781 gtttaagtct tactcagcca tttaacctt ttactccac ttacgttcat caaccgttga
841 ttgttttcag ctaaccacaa agacattgca acatcatact tactattctg agcatgaaca
901 gggatggcgg gcacagcctt aagcctcctt attcgagcag aactgggcca accagggact
961 ctgttagaag attatcaaat ttacaacggt attgttacg tccacgcat tatcataatt
1021 ttctttatag ttataaccaat cataatcgga ggtttcggca actgattagt ttctctcata
1081 attggcactc ccaatgtggc atttccccaa ataaataaca tgattttctg acttcttccc
1141 cagacccccg cctggcctgt ttctaccat gatgtgcgtc ctcaatggta aggcctggcg
1201 gcgggacccg ctggacagtt tatctctcct taacaggaaa ggtaacacgc aggatcctct
1261 gtggacccga tcaatctctc acttaattta gcagacatct cttctattct aggcgtgtt
1321 aattttacta ccaaatcat gaatccccc gtcatatccc aacatcacac acccctctc
1381 gcctgatcag tcctaattac agcagttcta cttctttctc ttccagtcct agcgccggc
1441 attactatac tattaactga ccataatctc aacactactt tgtttgaccc agctggtaga
1501 gttgaattct tctgttaaca acaattatct tgattttttg gccaccctga agtctatac
1561 cttatctctg aaggcttctg gataatctcc cacgtcgtaa cacagtattg tggaaaaaag
1621 gaaccatttg tgtacatgg catagaatga gccatagtag caattggttt cttaggattt
1681 atcatatggg ctaccacat acttacagta ggaatagatg tacatacac agcatacttc
1741 acctctgcca ctatgattat tgcaattatt gccctcccca ctggcgtaaa agtcttcagc
1801 ttgttagctt cactacatgg cagcaacatc aaatccccc aattctttga gccctgggat
1861 ttatatccct ttttatacta agaggtctga ccagcattgt actagtaaac tcatcactag
1921 atattgtctt gcatgacaca tattatgtta tagccattt caattacatc ttatccatag
1981 gaggcgtatt tgctattaca ggaggctttg tccactgatt tcccctattc tcaggttaca
2041 tacttagtca gacctatgt aaaattcatt ttaccatcat gtttacaggt gtttaattta
2101 cttttttccc acagcatttc ct

```

Notes:

Sequences 2 & 4 differ by:  
150 base mutations and 14 small insertions/deletions (not illustrated)  
which gives an approximate mutation/base rate of 7.6%
